# Supplementary material for: Protocol for a randomised controlled trial to improve cognitive functioning in older adults: the Iowa Healthy and Active Minds Study
Source: PubMed Central journal article supplement — BMJ Open. 2011 Sep 24;1(2):e000218. doi: 10.1136/bmjopen-2011-000218 (PMC3191599; doi:10.1136/bmjopen-2011-000218), 2011-09-24
Supplement: bmjopen-2011-000218.draft_revisions.pdf [file bmjopen-2011-000218.draft_revisions.pdf]

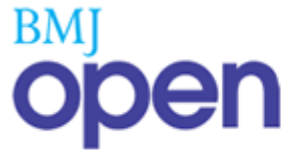

**A randomized controlled trial to improve cognitive functioning in older adults: the Iowa Healthy and Active Minds Study**

|                                 |                                                                                                                                                                                                                                                                                                                                                                                                                                                                                                                                         |
|---------------------------------|-----------------------------------------------------------------------------------------------------------------------------------------------------------------------------------------------------------------------------------------------------------------------------------------------------------------------------------------------------------------------------------------------------------------------------------------------------------------------------------------------------------------------------------------|
| Journal:                        | <i>BMJ Open</i>                                                                                                                                                                                                                                                                                                                                                                                                                                                                                                                         |
| Manuscript ID:                  | bmjopen-2011-000218                                                                                                                                                                                                                                                                                                                                                                                                                                                                                                                     |
| Article Type:                   | Protocol                                                                                                                                                                                                                                                                                                                                                                                                                                                                                                                                |
| Date Submitted by the Author:   | 14-Jun-2011                                                                                                                                                                                                                                                                                                                                                                                                                                                                                                                             |
| Complete List of Authors:       | Wolinsky, Fredric; University of Iowa, Health Management and Policy<br>Vander Weg, Mark; University of Iowa, Medicine<br>Howren, Matthew; University of Iowa, Medicine<br>Jones, Michael; University of Iowa, Biostatistics<br>Martin, Rene; University of Iowa, Nursing<br>Luger, Tana; University of Iowa, Psychology<br>Duff, Kevin; University of Utah, Neurology<br>Goerdts, Chris; University of Iowa, Medicine<br>Wolfe, Steven; University of Iowa, Medicine<br>Dotson, Megan; University of Iowa, Health Management and Policy |
| <b>Primary Subject Heading</b>: | Geriatric medicine                                                                                                                                                                                                                                                                                                                                                                                                                                                                                                                      |
| Keywords:                       | GERIATRIC MEDICINE, Delirium & cognitive disorders < PSYCHIATRY, PUBLIC HEALTH, Clinical trials < THERAPEUTICS                                                                                                                                                                                                                                                                                                                                                                                                                          |
|                                 |                                                                                                                                                                                                                                                                                                                                                                                                                                                                                                                                         |

SCHOLARONE™  
Manuscripts

1  
2  
3 **A randomized controlled trial to improve cognitive functioning in older adults:**  
4  
5 **the Iowa Healthy and Active Minds Study**  
6  
7  
8  
9  
10  
11  
12  
13  
14  
15  
16

17 Fredric D. Wolinsky  
18 Mark W. Vander Weg  
19 M. Bryant Howren  
20 Michael P. Jones  
21 Rene Martin  
22 Tana M. Luger  
23 Kevin Duff  
24 Christopher Goerd  
25 Steven Wolfe  
26 Megan M. Dotson  
27  
28  
29  
30  
31  
32  
33  
34  
35  
36  
37  
38  
39

40 Prepared for Submission to *BMJ Open*

41  
42 Words in Abstract = 291  
43 Words in Text = 4,492  
44 Figures = 5  
45 References = 49  
46  
47

48 June 14, 2011

49  
50 Running Head: An RCT of visual processing speed training: IHAMS  
51  
52  
53  
54  
55  
56  
57  
58  
59  
60

## Abstract

Objectives: Gradual age-related cognitive deteriorations are common and are hypothesized to be partially attributable to declines in information processing speed.

The Iowa Healthy and Active Minds Study (IHAMS) will evaluate the efficacy and effectiveness of a computerized visual processing speed training program (*Road Tour*, Posit Science Corporation, San Francisco, CA, USA).

Methods and Analysis: Using a 3:3:4:4 ratio within two age strata (50-64 vs.  $\geq 65$  years old), 681 men and women attending family care clinics were randomized to four treatment groups: 10 hours of on-site *Road Tour* training, 10 hours of on-site *Road Tour* training with 4 hours of booster training at 11 months post-randomization, 10 hours of on-site attention control using computerized crossword puzzles (*Boatload of Crosswords*, Boatload Puzzles, LLC, Yorktown Heights, New York, USA), and 10 hours of at-home *Road Tour* training using the participant's personal computer. The primary outcome, visual processing speed, was assessed at randomization and post-training (6-8 weeks post-randomization), and is being re-assessed at one-year post-randomization using the Useful Field of View test. Five secondary outcomes (Symbol Digit Modalities Test, Trail Making Tests A and B, Controlled Oral Word Association Test, Digit Vigilance Test, and the Stroop Color and Word Test) were assessed at randomization and will be re-assessed at one-year post-randomization. Seven hypotheses will be tested using intent-to-treat analyses involving multiple linear, logistic, Poisson, and negative binomial regression.

Ethics and Dissemination: Ethics approval was provided by the University of Iowa Institutional Review Board (IRB-03 protocol 200908789). All participants completed

1  
2  
3 signed informed consent prior to enrollment. *Road Tour* is commercially available from  
4  
5 Posit Science Corporation, which provided it to IHAMS at no cost. All participants will  
6  
7 receive a free copy of *Road Tour* for unlimited perpetual use at study completion.  
8  
9

10  
11 Clinical Trial Registration Number: NCT01165463.  
12  
13  
14  
15  
16  
17  
18  
19  
20  
21  
22  
23  
24  
25  
26  
27  
28  
29  
30  
31  
32  
33  
34  
35  
36  
37  
38  
39  
40  
41  
42  
43  
44  
45  
46  
47  
48  
49  
50  
51  
52  
53  
54  
55  
56  
57  
58  
59  
60

For peer review only

## Article Summary

### Article Focus:

- Given that age-related declines in cognitive functioning are part of the normal aging process, there is a pressing need for efficient and effective training interventions that improve cognitive functioning in older adults.
- This protocol paper outlines the design of a study that overcomes several important limitations of a prior, large, multi-site randomized controlled trial (RCT) that used memory, reasoning, and speed of processing interventions, but found that only the latter effectively translated to improved health outcomes.
- This RCT evaluates the efficacy and effectiveness of a second-generation computerized visual speed of processing intervention using three modes of delivery (on-site without booster training, on-site with booster training, and at-home use) vs. an attention control (on-site computerized crossword puzzles without boostertraining) in improving cognitive processing speed and health outcomes.

### Key Messages:

- This is an RCT protocol.
- IHAMS is the first RCT to evaluate the efficacy and effectiveness of a commercially available computerized visual speed of processing intervention known as *Road Tour*.

- If this intervention is successful, the product vendor pledges to make the computerized intervention software available to governments for widespread distribution and use at a fraction of the current commercial cost.

#### Strengths and Limitations of This Study:

- Strengths: this study uses six well-established, objective neuropsychological assessments of cognitive processing speed, as well as three highly reliable and valid self-reported measures of health outcomes in a large sample of men and women 50 years old and older.
- Limitations: although the sample is large, it was drawn from just one large primary care center in which minorities are underrepresented, and the key assessments are only conducted at randomization, after initial training (6-8 weeks post-randomization), and at one-year post-randomization, thereby reducing the opportunity to demonstrate the long-term effects of the intervention.

## Introduction

Some degree of gradual, age-related cognitive decline is recognized as universal and as a normal part of the aging process. This decline is evident across several domains including memory, orientation, attention, abstract thinking, and perception [1-4]. Age-related cognitive changes can best be viewed as one end of a continuum that includes preclinical disease, mild cognitive impairment, and dementia [5-8].

As the brain and the visual system age, many changes occur from the periphery through the central nervous system, contributing to deficits in visual perception and cognition [9-11]. Deficits are particularly notable in visual tasks requiring high levels of temporal precision (visual speed of processing) and attention (tracking multiple objects). These deficits are significant contributors to declines that emerge in visual cognition and visually-guided basic and instrumental activities of daily living (ADLs and IADLs) [12,13], and can be understood as the consequence of central nervous system changes involving brain plasticity. These brain-plasticity-driven changes are likely important contributors to the speed, memory, and cognitive deficits common in normal aging[14,15]. Brain plasticity, however, also creates an opportunity to strengthen cognitive abilities, and many studies have investigated the effects of interventions targeting specific abilities like memory, attention control, spatial orientation, inductive reasoning, figural relations, and artistic expression, or more globally by targeting multiple domains.

A new generation of these intervention studies is quite promising. Especially encouraging are recent studies that provide [14, p. 1]:

1  
2  
3           “...structured experience in situations demanding executive coordination  
4  
5           of skills—such as complex video games, task-switching paradigms, and  
6  
7           divided attention tasks...”  
8  
9

10       The advantage of these studies is that they “train strategic control over cognition that  
11       does transfer to different environments” [14, p. 1]. Several such studies focus on  
12       improving visual processing speed [16-19].  
13  
14

15           Salthouse has hypothesized that declines in processing speed adversely affect  
16       cognition in two ways—the limited time and simultaneity mechanisms [20]. Limited time  
17       refers to the restriction in the amount of time available to successfully accomplish a task  
18       when certain cognitive processes are completed too slowly. Simultaneity operates  
19       when slowed information processing promotes the loss of early cognitive processing  
20       products through decay or displacement before they are needed for later operations.  
21       Extensive evidence supports the speed of processing theory of age-related cognitive  
22       decline [19-23]. Associations between various subjective and objective health status  
23       measures and cognitive functioning are also related to processing speed to a greater  
24       degree than to other higher order cognitive processes, suggesting an important link  
25       between speed of processing and health outcomes [24]. Moreover, Salthouse has  
26       shown that processing speed peaks at about age 23, plateaus until age 28, and then  
27       declines in a linear fashion throughout the remainder of the life course [25].  
28  
29  
30  
31  
32  
33  
34  
35  
36  
37  
38  
39  
40  
41  
42  
43  
44  
45  
46  
47

48           One of the most impressive interventions focused on improving visual processing  
49       speed was developed by Ball and Roenker [19,20,26]. It improves the efficiency and  
50       accuracy of visual information processing and the ability to perform complex visual  
51       attention tasks. Specifically, users are trained to improve the speed and accuracy with  
52  
53  
54  
55  
56  
57  
58  
59  
60



1  
2  
3 which they identify and locate visual information using a divided attention format. Over  
4  
5 time, the difficulty and complexity of each task is systematically increased as users  
6  
7 attain specified performance criteria. Manipulations to increase difficulty include  
8  
9 decreasing visual stimuli duration, adding visual or auditory distracters, increasing  
10  
11 similarity between target and distracter stimuli, and presenting visual targets over a  
12  
13 broader spatial expanse. The basic tasks, however, are always the same—central  
14  
15 discrimination and peripheral target location.  
16  
17  
18

19  
20 Ball and Roenker's [19,20,26] program was extensively evaluated in the  
21  
22 Advanced Cognitive Training for Independent and Vital Elderly (ACTIVE) trial [27].  
23  
24 ACTIVE hypothesized that each of three intervention arms (memory, reasoning, and  
25  
26 visual processing speed training) would have a direct effect on targeted, trained  
27  
28 outcomes (proximal outcomes), and nonspecific effects on its non-targeted, untrained  
29  
30 outcomes (via social contact or cognitive engagement mechanisms). The reasoning  
31  
32 and memory interventions were expected to affect only everyday problem solving and  
33  
34 ADLs and IADLs, whereas the speed of processing intervention was hypothesized to  
35  
36 have more diverse effects, including ADL and IADL functioning, everyday speed, and  
37  
38 driving habits. All three interventions were expected to affect the secondary outcomes,  
39  
40 including health-related quality of life (HRQoL), depressive symptoms, and locus of  
41  
42 control. Although all ACTIVE treatments were effective at improving their targeted  
43  
44 abilities, visual speed of processing led to the largest gains [28,29]. Moreover, the  
45  
46 greatest relative improvements were clearly associated with visual speed of processing  
47  
48 training as well, which produced effect sizes more than double those associated with  
49  
50 the two other interventions at every time point.  
51  
52  
53  
54  
55  
56  
57  
58  
59  
60

1  
2  
3 The effects of ACTIVE's visual speed of processing intervention (vs. the no-  
4 contact control group) on the secondary, or health outcomes have been shown as well.  
5  
6 These included: (1) a \$244 per person-year (3%) reduction ( $p = .012$ ) in predicted  
7  
8 medical expenses at one-year [30]; (2) a 38% reduction in the risk of global decline in  
9  
10 HRQoL at two-years ( $p = .004$ ), and a 25.6% reduction in the risk of global decline in  
11  
12 HRQoL ( $p < .038$ ) at five-years [331,32]; (3) a 30% reduction in the risk of worsening  
13  
14 depressive symptoms at both one-year ( $p = .012$ ) and five-years ( $p = .023$ ) [33]; (4) a  
15  
16 38% reduction in the risk of the onset of suspected clinical depression at one-year ( $p <$   
17  
18  $.01$ ) [34]; (5) improvements in self-rated health at two-, three-, and five-years equivalent  
19  
20 to at least half of the difference between "excellent" and "very good" responses ( $p$   
21  
22  $< .05$ ), which is known to be associated with a 0.8% absolute reduction in the  
23  
24 five-year mortality rate, and a 10% relative mortality reduction [35]; and, (6) a 64%  
25  
26 greater likelihood ( $p < .05$ ) of improvements in internal locus of control at five-years [36].  
27  
28  
29  
30  
31  
32  
33  
34 No adverse effects of speed of processing training in ACTIVE have been identified.  
35

36 As important as it was, however, ACTIVE had five serious limitations.  
37  
38 First, ACTIVE used a no contact rather than an attention control group, making it  
39  
40 impossible to rule out placebo effects. Second, ACTIVE's approach to booster training  
41  
42 was compliance-conditioned, making it impossible to separate adherence effects from  
43  
44 dosing levels. Third, ACTIVE relied on only one speed of processing assessment test  
45  
46 (the Useful Field of View, or UFOV; [37]), which was sufficiently thematically  
47  
48 comparable to the speed of processing intervention itself that the results could merely  
49  
50 reflect "training to the test." Fourth, ACTIVE used an early version of the speed of  
51  
52 processing training that required supervised assistance, and is thus not practical for  
53  
54  
55  
56  
57  
58  
59  
60

1  
2  
3 widespread implementation. Finally, ACTIVE only included participants  $\geq 65$ , and thus  
4  
5 cannot be used to address the important issue of whether earlier age-related declines  
6  
7 [25] can be avoided or ameliorated.  
8  
9

### 10 11 **Current Study**

12 We designed the Iowa Healthy and Active Minds Study (IHAMS) to overcome  
13 ACTIVE's five limitations. IHAMS is a four-group RCT (NCT01165463). The first group  
14  
15 received a standard dose (10 hours) of computerized visual processing speed training  
16  
17 in our laboratory. The second group also received a standard dose of computerized  
18  
19 visual processing speed training in our laboratory, but they were invited back to the  
20  
21 laboratory for 4 hours of subsequent booster training regardless of their adherence to  
22  
23 their training. The third group (attention control) received a standard dose of training  
24  
25 using computerized crossword puzzles in our laboratory. The final group took the  
26  
27 computerized visual processing speed training software home to use it on their personal  
28  
29 computer (PC) for at least a standard dose. The primary outcome is visual processing  
30  
31 speed, which was assessed at randomization and after the completion of training (at 6-8  
32  
33 weeks post-randomization), and will be assessed again at one-year post-randomization.  
34  
35 Five secondary cognitive processing speed outcomes were assessed at randomization  
36  
37 and will be assessed again at one-year thereafter.  
38  
39  
40  
41  
42  
43  
44

45 We specified seven *a priori* hypotheses (**H<sub>n</sub>**) that we expect to be supported by  
46  
47 separate analyses in each age-stratum. The first addresses changes in the primary  
48  
49 outcome between randomization and post-testing. Because no standard booster  
50  
51 training occurred by this time, and because supplemental training beyond 10 hours  
52  
53 should in the at-home group should have been minimal, we hypothesize (**H<sub>1</sub>**) that  
54  
55 participants randomized to *Road Tour* training (Groups 1, 2, and 4) should have  
56  
57  
58  
59  
60

1  
2  
3 significantly and similarly greater improvements in visual processing speed immediately  
4  
5 after training than the attention control group (Group 3).  
6  
7

8 The six remaining hypotheses address expectations about changes in all six of  
9  
10 the primary and secondary outcomes between randomization and one-year post-  
11  
12 randomization. **H2** replicates ACTIVE (i.e., on-site delivery) and hypothesizes that the  
13  
14 basic and booster effects of visual speed of processing (Group 2) will be significantly  
15  
16 greater than those observed for the attention control group (Group 3). To separate the  
17  
18 basic effect (Group 1) from the basic plus booster effect (Group 2), we further hypothesize  
19  
20 (**H3**) that Group 1 will also improve significantly more than Group 3 (attention control),  
21  
22 but that (**H4**) Group 2 will improve significantly more than Group 1. **H5** examines the  
23  
24 effect of the at-home delivery of the visual speed of processing training (Group 4) vs.  
25  
26 the effect of the attention control training (Group 3); here we expect significantly greater  
27  
28 improvement for Group 4 than Group 3. **H6** and **H7** evaluate the different modes of  
29  
30 implementing the visual speed of processing intervention. We hypothesize (**H6**) that  
31  
32 given the potential for individual dosing and maintenance in Group 4 (at-home training)  
33  
34 it will have significantly greater improvement than Group 1 (on-site training without  
35  
36 boosters). **H7** evaluates the potential for individual dosing and maintenance vs.  
37  
38 standard booster training; here we hypothesize that the improvements for Group 4  
39  
40 (unlimited at-home dosing) will exceed those for Group 2 (in which standard and  
41  
42 booster training doses are fixed).  
43  
44  
45  
46  
47  
48  
49  
50  
51  
52  
53  
54  
55  
56  
57  
58  
59  
60

## Methods and Analysis

Figure 1 shows the IHAMS study design and participant recruitment results.

IHAMS is a four-arm parallel RCT using a 3:3:4:4 allocation ratio and block randomization separately within two age-strata (50-64 and 65-87 years old). Participants were randomized to one of the following groups: (1) 10 hours (over the first 5-6 weeks) of on-site training using *Road Tour* (Group 1), (2) 10 hours of on-site training using *Road Tour* plus 4 hours of booster training at 11 months post-randomization (Group 2), (3) 10 hours of on-site attention control using computerized crossword puzzles (Group 3), or (4) at-home training using *Road Tour* for 10 hours or more (Group 4). When enrollment closed in late November 2010, 681 participants had been randomized with 154 in Group 1, 148 in Group 2, 188 in Group 3, and 191 in Group 4. Post-training assessments occurred at 6-8 weeks post-randomization, and complete data were obtained for 616 participants (90.5%). One-year post-randomization assessments are scheduled to be completed by late November 2011. IHAMS was sized to provide  $\geq 80\%$  power to detect an effect size of 0.25 for **H2** at one-year post-randomization with  $\alpha = 0.05$ .

Study Sample and Recruitment. The sampling frame included all patients attending either the general internal or family medicine clinics of the University of Iowa's Family Care Center (FCC). The electronic medical record (*Epic*, Verona, Wisconsin, USA) was used to initially select potentially eligible participants who met the inclusion criteria: (1) age  $\geq 50$  years old, (2) regularly receiving primary care from the FCC ( $\geq 2$  visits in the past year), and (3) the absence of cognitive impairment indicated by ICD9-CM codes for Alzheimer's disease (331.0), Pick's disease (331.1), arteriosclerotic

1  
2  
3 dementia (290.4 to 290.43), other senile or pre-senile dementia (290.0 to 290.9),  
4  
5 dementia due to alcohol (291.1 to 291.2) or drugs (292.82 to 292.83), amnestic  
6  
7 syndrome (294.0), or dementia due to other organic conditions (294.1). A total of 5,743  
8  
9 potentially eligible patients were identified.  
10  
11

12  
13 Weekly random (without replacement) replicates of 100-250 of the 5,743  
14  
15 potentially eligible patients received a letter describing the study that was co-signed by  
16  
17 the FCC medical directors (CG and SW) and the principal investigator (FDW). These  
18  
19 patients were asked to telephone the project office to indicate whether they were or  
20  
21 were not interested in participating. A fortnight later, we initially telephoned non-  
22  
23 responders to determine their interest, but because this approach had a very low rate of  
24  
25 return, it was abandoned.  
26  
27

28  
29 Telephone Screening for Eligibility. We attempted to screen all 5,743 potentially  
30  
31 eligible patients. Despite  $\geq 3$  telephone calls each, we were unable to reach 1,627.  
32  
33 Upon achieving telephone contact with the remainder, 2,079 declined to participate. We  
34  
35 then conducted brief screening interviews among interested patients. These screening  
36  
37 interviews identified potential participants who met any of the exclusion criteria that  
38  
39 could not be ascertained using *Epic*: (1) significant cognitive impairment evidenced  
40  
41 by  $\geq 3$  errors on a 10-item mental status exam[38], (2) self-reported uncorrected visual  
42  
43 acuity problems that would interfere with using a PC, (3) not having a PC with a CD-  
44  
45 ROM in the home, (4) not having internet access, and (5) having previously used a  
46  
47 cognitive training program. This led to the exclusion of 1,356 potential participants.  
48  
49  
50  
51

52  
53 Informed Consent and Baseline Interviews. After successfully completing the  
54  
55 screening telephone interview, eligible patients were scheduled for a two-hour  
56  
57  
58  
59  
60

1  
2  
3 appointment in our laboratory where the purpose and design of the study were  
4 explained, and written informed consent was obtained. The informed consent process  
5 took about 15 minutes. After providing informed consent, the 681 enrollees were  
6 administered their baseline (randomization) interviews by trained research assistants  
7 using computer-assisted interviewing protocols. The baseline interviews took about 1.5  
8 hours, and included the neuropsychological assessments, health outcomes, and  
9 covariates described below. Immediately after their baseline interview, participants  
10 were randomized to one of the four study groups.  
11  
12  
13  
14  
15  
16  
17  
18  
19  
20  
21

22 Randomization Procedure. The study biostatistician (MPJ) determined the order  
23 of assignments using a computer-generated list of random numbers and a 3:3:4:4 ratio  
24 based on *a priori* power calculations. Block randomization was used to maintain  
25 balance on two age-strata (50-64 and  $\geq 65$ ). Block sizes of 4, 8, and 12 were randomly  
26 varied. The assignment for each participant's ID number was recorded on a participant  
27 letter and then sealed in an opaque envelope with only the ID number visible. Two age-  
28 strata specific boxes containing the assignment envelopes were stored in a locked  
29 cabinet in the Project Coordinator's office. The Project Coordinator (MMD) had the  
30 responsibility of unsealing the envelope (from the appropriate age-stratum box) and  
31 revealing each participant's group assignment.  
32  
33  
34  
35  
36  
37  
38  
39  
40  
41  
42  
43  
44  
45

46 Cognitive Processing Speed Outcomes. The six IHAMS neuropsychological  
47 assessments are: (1) the UFOV PC mouse version [19]; (2) the Symbol Digit Modalities  
48 Test (SDMT) [39]; (3) the Trail Making A and B Tests (TMT) [40]; (4) the Controlled Oral  
49 Word Association Test (COWAT) [41]; (5) the Digit Vigilance Test (DVT) [42]; and, (6)  
50 the Stroop Color and Word Test (Stroop) [43]. The UFOV is the primary outcome and  
51  
52  
53  
54  
55  
56  
57  
58  
59  
60

1  
2  
3 was administered at randomization and post-training (6-8 weeks post-baseline), and will  
4 be re-administered at one-year post-randomization. The UFOV includes three  
5 subtests—stimulus identification, divided attention, and selective attention—each  
6 scored from 17-500 milliseconds (ms) reflecting the shortest exposure time at which the  
7 participant could correctly perform each subtest 75% of the time, with a composite ms  
8 outcome score ranging from 51-1500 ms.  
9  
10  
11  
12  
13  
14  
15  
16

17 The SDMT, TMT, COWAT, DVT, and Stroop tests are secondary outcome  
18 measures and were all administered at randomization, and will be re-administered at  
19 one-year post-randomization. SDMT captures divided attention and processing speed,  
20 and is based on how many of 110 possible digit-symbol pairs were scored as correct  
21 pairs by the participant in 90 seconds. TMT assesses visual scanning ability,  
22 processing speed, and set-shifting/executive functioning, and is coded as the number of  
23 seconds needed to correctly complete connecting the number and number-letter sets.  
24 COWAT assesses verbal fluency based on the number of unique words beginning with  
25 the letter C (or F or L) generated by the participant during 60 seconds, with a composite  
26 score of the number of correct words used across the three letter trials. DVT assesses  
27 sustained attention and psychomotor speed, is performed by crossing out randomly  
28 placed 6's in 59 rows of numbers, and is scored as the error and time totals. The  
29 Stroop assesses processing speed and executive functioning, and is scored as the  
30 correct number of words, colors, and color-words identified in 45 seconds on each  
31 subtest.  
32  
33  
34  
35  
36  
37  
38  
39  
40  
41  
42  
43  
44  
45  
46  
47  
48  
49  
50  
51

52 Health Outcomes. Three health outcome measures—HRQoL, depressive  
53 symptoms, and sense of control—are included. Each has established reliability  
54  
55  
56  
57  
58  
59  
60



1  
2  
3 and validity, and yet is relatively brief. The 36-item SF-36[44] is used to measure  
4 HRQoL. Scores on each of its 8 subscales are transformed to range from 0 (worst  
5 health) to 100 (best health). Depressive symptoms are measured using the 12-item  
6 Center for Epidemiologic Studies Depression scale (CESD-12)[45]. CESD-12 scores  
7 range from 0 (no symptoms acknowledged) to 36 (all 12 symptoms acknowledged to  
8 occur most or all of the time), with scores  $\geq 9$  being the screening threshold for  
9 suspected clinical depression [34]. Sense of control is measured using Mirowsky and  
10 Ross' eight-item 2x2 Index [46]. The sense of control score is the sum of the item  
11 responses, and ranges from maximally denying (-16) to maximally claiming control  
12 (+16).

13  
14  
15  
16  
17  
18  
19  
20  
21  
22  
23  
24  
25  
26  
27 Covariates. To adjust for potential heterogeneity across the treatment groups,  
28 several covariates were obtained at randomization. These included various  
29 sociodemographic characteristics, multiple indicators of socioeconomic status, medical  
30 history, ADLs and IADLs, perceived stress, self-efficacy, and attitudes towards and the  
31 use of computers in everyday life, among others.

32  
33  
34  
35  
36  
37  
38  
39 The Road Tour Training Program. In November 2007, Posit Science Corporation  
40 (San Francisco, California, USA) acquired the rights to Ball and Roenker's original visual  
41 speed of processing training program [19,20,26]. While Posit Science retained all of the  
42 original tasks, it modified the delivery platform to be user-friendly and self-administered,  
43 improving the ease of dissemination and implementation. The addition of certain game  
44 elements also improves user engagement and enhances compliance. The resulting  
45 second-generation computerized speed of processing training program is known as  
46 *Road Tour*, and is commercially available (<http://www.positscience.com/our-products>).

1  
2  
3  
4  
5  
6  
7  
8  
9  
10  
11  
12  
13  
14  
15  
16  
17  
18  
19  
20  
21  
22  
23  
24  
25  
26  
27  
28  
29  
30  
31  
32  
33  
34  
35  
36  
37  
38  
39  
40  
41  
42  
43  
44  
45  
46  
47  
48  
49  
50  
51  
52  
53  
54  
55  
56  
57  
58  
59  
60

*Road Tour's* appearance is shown in Figure 2. After clicking on the start button to initiate training, Figure 2b is shown. Here, both the license plate area and the eight circular locations in the near orbit surrounding it are empty. The empty license plate is then replaced, as in Figure 2c, with the target vehicle, either a car or a truck. Similarly, the eight empty circular locations surrounding the license plate are then replaced with seven distracter stimuli (rabbit crossing signs) or the target sign (Route 66). The stimuli (car vs. truck, and rabbit crossing vs. Route 66 sign) are presented for a specified time and are then replaced by Figure 2d. The amount of time that Figure 2c remains on the screen before being replaced by Figure 2d is measured in ms. In Figure 2e, both target vehicles (the car and truck) are presented in the center of the screen. The user first clicks on the correct target vehicle (car or truck), and then on the circular location where the correct peripheral target (Route 66 sign) appeared (Figure 2f). The goal is to improve cognitive processing speed by progressively reducing the ms of exposure that Figure 2c remains on the screen with subsequent correct identification of both the stimuli (car or truck) and target (Route 66) sign.

The training program is tailored to the participant's performance such that it maintains a 75% success rate before advancing to a shorter exposure time. The gaming aspect involves the user deciding where to place a car in the ring of cars when a trial (identification of the vehicle and Route 66 sign) is correct (Figure 2f). When car placement produces a sequence of three cars of the same color, these cars disappear, and the user's car moves around the ring. This gaming element increases the user's engagement in the exercise. Each lap around the ring gets the user's car closer to the next destination. In the initial (early) trials of the exercise, there are only seven

1  
2  
3 distracters within the near orbit around the license plate. As the user progresses, three  
4  
5 changes occur to increase task difficulty: (a) the target visual field expands (Figures 3a-  
6  
7 c) by progressing outward from the license plate to add medium and distal orbits; (b)  
8  
9 these are accompanied by an increasing number of distracters to populate all three  
10  
11 orbits (up to 47; Figures 4a-b); and, (c) the vehicle pairs morph through 9 different  
12  
13 stages or pairs to become more similar and thus more difficult to differentiate (Figure 5).  
14  
15

16  
17 *Road Tour* captures the participant's experience two ways, both of which are  
18  
19 routinely sent in the background to Posit Science and our research laboratory over the  
20  
21 internet using secure file encryption protocols. One assessment is the amount of time  
22  
23 spent playing *Road Tour*. The targeted standard training dose was 10 hours. Use can  
24  
25 also be assessed by the percentage of completion of all 81 of the available exercise  
26  
27 sets. In addition to monitoring use, *Road Tour* also administers an assessment of visual  
28  
29 processing speed at random intervals. This assessment is the number of ms that Figure  
30  
31 2c must remain exposed to the participant to achieve the specified correct identification  
32  
33 (success) rate. It is estimated as the log mean of two randomly interleaved ZEST (zippy  
34  
35 estimation by sequential testing; [47]) adaptive Bayesian algorithms [48] which employ a  
36  
37 cumulative Gaussian curve starting at 6.75% (chance correct rate) and ending at 95%  
38  
39 (100% minus 5% lapse rate) with the threshold set at 50%.  
40  
41  
42  
43  
44  
45

46 Group 1. Immediately after completing their informed consent and baseline  
47  
48 interviews, participants randomly assigned to Group 1 (on-site *Road Tour* training  
49  
50 without boosters) were scheduled for their first two-hour session in our laboratory, which  
51  
52 includes two identical training rooms configured with 5 private PC workstation areas.  
53  
54  
55 The *Road Tour* training software is on the PCs in one training room, and the  
56  
57  
58  
59  
60

1  
2  
3 computerized crossword puzzle software is on the PCs in the other. At their first  
4  
5 session, Group 1 participants were assigned their study specific ID number, and after  
6  
7 receiving about 5-10 minutes of scripted instruction on how to use *Road Tour*, were  
8  
9 asked to use the training program for the remainder of that session. Participants were  
10  
11 then scheduled for their next two-hour training session, which usually occurred the  
12  
13 following week. A total of five, weekly two-hour training sessions were scheduled for  
14  
15 the standard training dose. After completing 10 hours of training, or by 6-8 weeks post-  
16  
17 randomization, whichever came first, Group 1 participants were invited back to the  
18  
19 laboratory for their post-training assessments using the UFOV test.  
20  
21  
22  
23

24  
25 Group 2. Participants randomly assigned to Group 2 (on-site *Road Tour* training  
26  
27 with boosters) were treated the same as those in Group 1 with one exception. Unlike  
28  
29 Group 1 participants, Group 2 participants were invited back to our laboratory for two 2-  
30  
31 hour booster training sessions at 11 months post-randomization. Group 2 participants  
32  
33 also completed additional UFOV testing both before and after their booster training.  
34  
35

36  
37 Group 3. Participants randomized to Group 3 (on-site computerized crossword  
38  
39 puzzle training; attention control) were treated the same as participants randomized to  
40  
41 Group 1, with one exception. Instead of using *Road Tour*, Group 3 participants were  
42  
43 taken to our second training room and instructed how to use the computerized  
44  
45 crossword puzzle program (*Boatload of Crosswords*, Boatload Puzzles, LLC, Yorktown  
46  
47 Heights, New York, USA).  
48  
49

50  
51 Group 4. Participants randomly assigned to Group 4 (at-home *Road Tour*  
52  
53 training) were scheduled for their first session in our laboratory immediately after  
54  
55 completing their informed consent and baseline interviews. They, however, were taken  
56  
57  
58  
59  
60

1  
2  
3 to a third room in which they were assigned their study specific ID number, and were  
4 then shown (step-by-step) how to load the software on a PC. After this, they received  
5 about 5-10 minutes of scripted instruction on how to use *Road Tour*, and then practiced  
6 using it for about 10-15 minutes. Group 4 participants were then sent home with the CD  
7 containing the *Road Tour* software to load on their home PCs, as well as a detailed set  
8 of step-by-step instructions containing all of the screen-shots that they would encounter  
9 in doing so. They were also given the phone number and email information for  
10 contacting the Project Coordinator (MMD) to answer any questions they might have  
11 about loading the software onto their home PCs. Group 4 participants were asked to  
12 use *Road Tour* at home for 10 hours or more during the next 5-6 weeks. At 6-8 weeks  
13 post-randomization, Group 4 participants were invited back to the laboratory for their  
14 post-training assessments using the UFOV test. At that time, they were reminded that  
15 they could continue using *Road Tour* as often as they liked.

16  
17  
18  
19  
20  
21  
22  
23  
24  
25  
26  
27  
28  
29  
30  
31  
32  
33  
34 Analysis. For the purposes of statistical modeling, we define three mutually  
35 exclusive 1-0 binary indicators **G1**, **G2**, and **G4** to indicate whether the participant is in  
36 the on-site speed of processing intervention without boosters, the on-site speed of  
37 processing intervention with boosters, or the at-home speed of processing group. The  
38 on-site crossword puzzle (attention control; **G3**) group participant will have all three of  
39 these indicators set to zero. Other covariates are contained in the vector **X**. For  
40 continuous outcomes like visual processing speed we will use multiple linear regression  
41 models [49] that may be expressed in their simplest form as:

$$Y_{12} = \beta_0 + \beta_1 Y_b + \beta_2 G1 + \beta_3 G2 + \beta_4 G4 + \beta_5 X + \varepsilon$$

1  
2  
3 where  $Y_{12}$  is the dependent variable at the 12-month post-randomization assessment,  $\beta_0$   
4 is the intercept,  $\beta_1$  is the coefficient for  $Y_b$  (the baseline [randomization] value of the  
5 dependent variable),  $\beta_2$  is the coefficient for  $G1$  (Group 1),  $\beta_3$  is the coefficient for  $G2$   
6 (Group 2),  $\beta_4$  is the coefficient for  $G4$  (Group 4),  $\beta_5$  is the vector of coefficients for  $X$  (the  
7 vector of covariates), and  $\epsilon$  is the error term. The effect of  $\beta_1$  represents a stability  
8 coefficient, the effects of  $\beta_2, \beta_3$ , and  $\beta_4$  represent the effects of being randomized to the  
9 three *Road Tour* intervention groups (Groups 1, 2, and 4), respectively, on changes in  
10 the dependent variable compared to those observed for the attention control group  
11 (Group 3), and the effects of  $\beta_5$  represent the effects of the covariates on changes in the  
12 dependent variable. When the dependent variable is a count measure, we will use  
13 Poisson or negative binomial regression techniques, and for binary outcomes (such as  
14 the onset of suspected clinical depression [CESD-12 scores  $\geq 9$ ]), we will use logistic  
15 regression.

### 33 Ethics and Dissemination

34  
35  
36 IHAMS was viewed as a minimal risk trial by the University of Iowa IRB for three  
37 reasons. First, no adverse effects were reported from the earlier version that was used  
38 in ACTIVE. Second, *Boatload of Crosswords*, the computerized crossword puzzle  
39 program, is the most popular puzzle game commercially available. Third, our IRB  
40 protocol (200908789) established procedures to ensure that participation was voluntary,  
41 that participants could quit at any time they chose, that signed informed consent was  
42 obtained, that confidentiality was maintained, and that data security was rigorous.  
43  
44 Participants received \$25 for completing their randomization interviews, \$5 for each  
45 UFOV test, and \$50 for completing the one-year post-randomization interview.

1  
2  
3 We will disseminate the results from IHAMS via conference presentations and  
4 journal publications. Four subsequent journal articles will focus on (1) the post-training  
5 UFOV results, (2) the one-year post-randomization results on all six neuropsychological  
6 assessments, (3) the health outcome results at one-year post-randomization, and (4)  
7 effectiveness-derived dose-response curves. If the one-year post-randomization results  
8 demonstrate the efficacy and effectiveness of *Road Tour*, Posit Science will work with  
9 government agencies to make the program available for wide-scale implementation “at  
10 only a fraction of the current per-user cost.”  
11  
12  
13  
14  
15  
16  
17  
18  
19  
20  
21  
22  
23  
24  
25  
26  
27  
28  
29  
30  
31  
32  
33  
34  
35  
36  
37  
38  
39  
40  
41  
42  
43  
44  
45  
46  
47  
48  
49  
50  
51  
52  
53  
54  
55  
56  
57  
58  
59  
60

## End Matter

Acknowledgements: The authors acknowledge and applaud the 681 participants from the University of Iowa FCC general internal and family medicine clinics. Without their participation and support, this study would not have been possible. The authors also acknowledge the research assistants, work-study students, and other support staff involved in IHAMS.

Funding: This study was supported by US NIH grant RC1 AG-035546 to FDW.

Competing Interests: The *Road Tour* computerized visual speed of processing intervention used in IHAMS is commercially available from Posit Science Corporation (San Francisco, CA, USA). None of the members of the investigative team have any conflicts of interest or conflicts of commitment involving Posit Science. Specifically, no one on the investigative team will financially profit in any way from the use of *Road Tour* in IHAMS, or in any subsequent study using *Road Tour*.

Posit Science acquired ownership in October 2007 of the original speed of processing intervention that was used in the multi-site ACTIVE RCT on which FDW was an original co-investigator (at the ACTIVE Indiana University site). The ACTIVE speed of processing intervention had been developed earlier by Karlene Ball (ACTIVE site-PI at the University of Alabama-Birmingham, USA) and Dan Roenker (at Western Kentucky University, USA). In collaboration with Professors Ball and Roenker, Posit Science subsequently developed the second-generation, value-added version of the visual speed of processing intervention known as *Road Tour* and used here in IHAMS. From December 2007 to March 2009, FDW had a limited, part-time consulting arrangement (15 days, total) with Posit Science to support additional analyses of the first five-years of



1  
2  
3 the ACTIVE follow-up data that had not been identified in the original ACTIVE protocols  
4 nor funded by the various US NIH grants supporting ACTIVE. This arrangement was  
5 approved in advance by the ACTIVE Executive Committee (which included the US NIH  
6 project officers), and was sanctioned by the Provost of the University of Iowa.  
7  
8  
9  
10  
11

12  
13 After terminating this limited, part-time consulting arrangement with Posit  
14 Science, FDW applied in April 2009 for, and was awarded in September 2009 the US  
15 NIH Challenge Grant known as IHAMS. Posit Science provided the 700 copies of *Road*  
16 *Tour* used in IHAMS at no cost whatsoever. Furthermore, in its letter of commitment to  
17 IHAMS and the US NIH, Posit Science stated should the results support the efficacy  
18 and effectiveness of *Road Tour*, they will “work with agencies at the federal government  
19 to make the program available for wide-scale implementation at only a fraction of the  
20 current per-user cost.”  
21  
22  
23  
24  
25  
26  
27  
28  
29  
30

31  
32 Ethics Approval: Ethics approval was provided by the University of Iowa  
33 Institutional Review Board (IRB-03; IRB protocol number 200908789), initially approved  
34 on September 12, 2009, and most recently re-approved on May 18, 2011.  
35  
36  
37  
38

39  
40 Contributors: FDW is the principal investigator on the study, wrote the original  
41 proposal, supervised the trial, conducted all of the analyses, and drafted the manuscript.  
42 MWV-W is co-principal investigator on the study, collaborated on the original proposal,  
43 co-supervised the trial, and reviewed the analyses reported here as well as the  
44 manuscript itself. MBH is a post-doctoral fellow working on the study, trained all of the  
45 interviewers, supervised the scoring of the neuropsychological tests, and reviewed the  
46 manuscript. MPJ is the study biostatistician, devised the randomization protocol,  
47 reviewed all of the analyses, and reviewed the manuscript. RM is a co-investigator on  
48  
49  
50  
51  
52  
53  
54  
55  
56  
57  
58  
59  
60

1  
2  
3 the study, reviewed all of the ethics, consent, and IRB documents, and reviewed the  
4  
5 manuscript. TML was a study Research Assistant who assisted with piloting the  
6  
7 interview protocol, conducted randomization interviews, and reviewed the manuscript.  
8  
9  
10 KD is the study neuropsychologist, supervised selection of the neuropsychological tests,  
11  
12 reviewed the psychometric analyses, and reviewed the manuscript. CG is the medical  
13  
14 director of the FCC General Medicine Clinic, participated in subject recruitment, and  
15  
16 reviewed the manuscript. SW is the medical director of the FCC Family Medicine Clinic,  
17  
18 participated in subject recruitment, and reviewed the manuscript. MMD is the Project  
19  
20 Coordinator.  
21  
22  
23

24 Provenance and Peer Review: IHAMS was not a commissioned study. It was  
25  
26 externally peer reviewed by a panel of Distinguished Editors (ZRG1 RPHB-E 58)  
27  
28 convened by the US NIH to select approximately 200 Challenge Grant Applications  
29  
30 (RC1s) submitted in response to the American Recovery and Reinvestment Act of 2009  
31  
32 (from a pool of about 23,000 submitted proposals).  
33  
34  
35  
36  
37  
38  
39  
40  
41  
42  
43  
44  
45  
46  
47  
48  
49  
50  
51  
52  
53  
54  
55  
56  
57  
58  
59  
60

## References

1. Birren JE, Woods AM, & Williams MV. Behavioral slowing with age: causes, organization, and consequences of slowing. Pp. 293–308 in Poon LW (ed), *Aging in the 1980s: psychological issues*. Washington, DC: American Psychological Association, 1980.
2. Edwards JD, Wadley VG, Myers RS, Roenker DL, Cissell GM, & Ball KK. Transfer of a speed of processing intervention to near and far cognitive functions. *Gerontol*, 2002;48:329–340.
3. Madden DJ. Four to ten milliseconds per year: age-related slowing of visual word identification. *J Gerontol: Psych Sci*, 1992;47:P59–P68.
4. Roenker DL, Cissell GM, Ball KK, Wadley VG, & Edwards JD. Speed-of-processing and driving simulator training result in improved driving performance. *Hum Factors*, 2003;45:218–233.
5. Cronin-Golomb A. Pp. 517-530 in Hof PR, & Mobbs CV (eds). *Functional neurobiology of Aging*. San Diego, CA: Academic Press, 2001.
6. McDowd JM, & Shaw RJ. Pp. 221-292 in Craik FIM, & Salthouse TA (eds). *The handbook of aging and cognition*. Mahwah, NJ: Lawrence Erlbaum Associates, 2000.
7. Schneider BA, & Pichora-Fuller MK. Pp. 155-220 in Craik FIM, & Salthouse TA (eds). *The handbook of aging and cognition*. Mahwah, NJ: Lawrence Erlbaum Associates, 2000.
8. Albert MS, DeKosky ST, Dickson D, Dubois B, Feldman HH, Fox NC, Gams A, Holtzman DM, Jagust WJ, Petersen RC, Snyder PJ, Carrillo M, Thies B, & Phelps

1  
2  
3 CH. The diagnosis of mild cognitive impairment due to Alzheimer's disease:  
4  
5 Recommendations from the National Institute on Aging and Alzheimer's  
6  
7 Association workgroup. *Alzheimers Dement*, 2011;7:270-279.  
8  
9

10 9. Jack CR, Albert M, Knopman DS, McKhann GM, Sperling RA, Carrillo MC, Thies B, &  
11  
12 Phelps CH. Introduction to revised criteria for the diagnosis of Alzheimer's  
13  
14 disease: National Institute on Aging and the Alzheimer's Association  
15  
16 workgroup. *Alzheimers Dement*, 2011;7:257-262.  
17  
18

19  
20 10. McKhann GM, Knopman DS, Chertkow D, Hyman BT, Jack CR, Kawashi CH, Klunk  
21  
22 WE, Koroshetz WJ, Manly JJ, Mayeux R, Mohs RC, Morris JC, Rosso MN, Schelten  
23  
24 P, Carrillo MC, Thies B, Weintraub S, & Phelps CH. The diagnosis of dementia  
25  
26 due to Alzheimer's disease: Recommendations from the National Institute on  
27  
28 Aging and the Alzheimer's Association workgroup. *Alzheimers Dement*,  
29  
30 2011;7:263-269.  
31  
32

33  
34 11. Sperling RA, Aisen PS, Beckett LA, Bennett DA, Craft S, Fagan AN, Iwatsubo T, Jack  
35  
36 CR, Kaye J, Montine TJ, Park DC, Reiman EM, Rowe CC, Siemers E, Stern Y,  
37  
38 Yaffe K, Carrillo MC, Thies B, Morrison-Bogorad M, Wagster MV, & Phelps CH.  
39  
40 Toward defining the preclinical stages of Alzheimer's disease:  
41  
42 Recommendations from the National Institute on Aging and the Alzheimer's  
43  
44 Association workgroup. *Alzheimers Dement*, 2011;7:280-292.  
45  
46  
47

48 12. Burdick DJ, Rosenblatt A, Samus QM, Steele C, Baker A, Harper M. Predictors of  
49  
50 functional impairment in residents of assisted living facilities: The Maryland  
51  
52 Assisted Living Study. *J Gerontol: Med Sci*, 2005;60A:258-264.  
53  
54  
55  
56  
57  
58  
59  
60

- 1  
2  
3 13. Cahn-Weiner DA, Malloy PF, Boyle PA, Marran M, & Salloway S. Prediction of  
4  
5 functional status from neuropsychological tests in community-dwelling elderly  
6  
7 individuals. *Clin Neuropsychol*, 2000;14:187–195.  
8  
9
- 10 14. Hertzog C, Kramer AF, Wilson RS, & Lindenberger U. Enrichment effects on adult  
11  
12 cognitive development: can the functional capacity of older adults be preserved  
13  
14 and enhanced? *Psychol Sci Pub Interest*, 2008;9, 1-65  
15  
16
- 17 15. Salthouse TA. Consequences of age-related cognitive declines. *Ann Rev Psychol*,  
18  
19 2012;63: in press.  
20  
21
- 22 16. Salthouse TA. The processing-speed theory of adult age differences in  
23  
24 cognition. *Psychol Rev*, 1996;103:403-428.  
25  
26
- 27 17. Schaie KW. *Intellectual development in adulthood: the Seattle Longitudinal Study*.  
28  
29 New York: Cambridge University Press, 1996.  
30  
31
- 32 18. Smith AD, & Earles JLK. Memory changes in normal aging. Pp. 192–220 in  
33  
34 Blanchard-Fields F, & Hess TM (eds.), *Perspectives on cognitive change in*  
35  
36 *adulthood and aging*. New York: McGraw-Hill, 1996.  
37  
38
- 39 19. Edwards JD, Vance DE, Wadley VG, Cissel GM, Roenker DL, & Ball KK. Reliability  
40  
41 and validity of Useful Field of View test scores as administered by personal  
42  
43 computer. *J Clin Exper Neuropsychol*, 2005;27:529–543.  
44  
45
- 46 20. Wadley VG, Benz RL, Ball KK, Roenker DL, Edwards JD, & Vance  
47  
48 DE. Development and evaluation of home-based speed of processing training for  
49  
50 older adults. *Arch Phys Med Rehab*, 2006;87:757–763.  
51  
52  
53  
54  
55  
56  
57  
58  
59  
60

- 1  
2  
3  
4  
5  
6  
7  
8  
9  
10  
11  
12  
13  
14  
15  
16  
17  
18  
19  
20  
21  
22  
23  
24  
25  
26  
27  
28  
29  
30  
31  
32  
33  
34  
35  
36  
37  
38  
39  
40  
41  
42  
43  
44  
45  
46  
47  
48  
49  
50  
51  
52  
53  
54  
55  
56  
57  
58  
59  
60
21. Clay OJ, Edwards JD, Ross LA, Okonkwo O, Wadley VG, Roth DL, & Ball KK. Visual function and cognitive speed of processing mediate age-related decline in memory span and fluid intelligence. *J Aging Health*, 2009;21:547-566.
  22. Lemke U, & Zimprich D. Longitudinal changes in memory performance and processing speed in old age. *Aging, Neuropsychol, Cog*, 2005;12:57-77.
  23. Zimprich DM. Can longitudinal changes in processing speed explain longitudinal changes in fluid intelligence? *Psychol Aging*, 2002;17:690-695.
  24. Rosnick CB, Small BJ, Graves AB, & Mortimer JA. The association between health and cognitive performance in a population-based study of older adults: the Charlotte County Healthy Aging Study (CCHAS). *Aging Neuropsychol Cog*, 2004;11:89-99.
  25. Salthouse TA. When does age-related cognitive decline begin? *Neurobiol Aging*, 2009;30:507-514.
  26. Ball KK, Edwards JD, & Ross LA. The impact of speed of processing training on cognitive and everyday functions. *J Gerontol: SocSci*, 2007;62B:19-31.
  27. Jobe JB, Smith DM, Ball KK, Tennstedt SL, Marsiske M, Willis SL, Rebok GW, Morris JN, Helmers KF, Leveck MD, & Kleinman K. ACTIVE: a cognitive intervention trial to promote independence in older adults. *Controlled Clin Trials*, 2001;22:453-479.
  28. Ball KK, Berch DB, Helmers KF, Jobe JB, Leveck MD, Marsiske M, Morris JN, Rebok GW, Smith DM, Tennstedt SL, Unverzagt FW, & Willis SL. Effects of cognitive training interventions with older adults: a randomized controlled trial. *JAMA*, 2002;288:2271-2281.

- 1  
2  
3  
4  
5  
6  
7  
8  
9  
10  
11  
12  
13  
14  
15  
16  
17  
18  
19  
20  
21  
22  
23  
24  
25  
26  
27  
28  
29  
30  
31  
32  
33  
34  
35  
36  
37  
38  
39  
40  
41  
42  
43  
44  
45  
46  
47  
48  
49  
50  
51  
52  
53  
54  
55  
56  
57  
58  
59  
60
29. Willis SL, Tennstedt SL, Marsiske M, Ball KK, Elias J, Mann-Koepke K, Morris JN, Rebok GW, Unverzagt FW, Stoddard A, & Wright E. Long-term effects of cognitive training on everyday functional outcomes in older adults. *JAMA*, 2006;296:2805-2814.
30. Wolinsky FD, Mahncke HW, Kosinski M, Unverzagt FW, Smith DM, Jones R, Stoddard A, & Tennstedt SL. The ACTIVE cognitive training trial and predicted medical expenditures. *BMC Health Serv Res*, 2009;9:109:1-9.
31. Wolinsky FD, Unverzagt FW, Smith DM, Jones R, Wright E, & Tennstedt S. The effects of the ACTIVE cognitive training interventions on clinically relevant declines in health-related quality of life. *J Gerontol: SocSci*, 2006;61B:S281-S287.
32. Wolinsky FD, Unverzagt FW, Smith DM, Jones R, Stoddard A, & Tennstedt S. The ACTIVE cognitive training trial and health-related quality of life: protection that lasts for five years. *J Gerontol: Med Sci*, 2006;61A:1324-1329.
33. Wolinsky FD, Vander Weg MW, Martin R, Unverzagt FW, Ball KK, Jones R, & Tennstedt SL. The effect of speed of processing training on depressive symptoms in ACTIVE. *J Gerontol: MedSci*, 2009;64A:468-472.
34. Wolinsky FD, Mahncke HW, Vander Weg MW, Martin R, Unverzagt FW, Ball KK, Jones R, & Tennstedt SL. The ACTIVE cognitive training interventions and the onset of and recovery from suspected clinical depression. *J Gerontol: PsycholSci*, 2009;64B:577-585.
35. Wolinsky FD, Mahncke HW, Vander Weg MW, Martin R, Unverzagt FW, Ball KK, Jones R, & Tennstedt SL. Speed of processing training improves self-rated health

- 1  
2  
3 in older adults: enduring effects observed in the multi-site ACTIVE study.  
4  
5  
6 *IntPsychogeriatr*, 2010;22:470-478.  
7
- 8 36. Wolinsky FD, Vander Weg MW, Martin R, Unverzagt FW, Willis SL, Marsiske M,  
9  
10 Rebok GW, Morris JN, Ball KK, & Tennstedt SL. Cognitive training improves  
11  
12 internal locus of control among older adults. *J Gerontol: Soc Sci*, 2010;65B:470-  
13  
14 478.  
15  
16
- 17 37. Ball KK, Beard BL, Roenker DL, Miller RL, & Griggs DS. Age and visual search:  
18  
19 expanding the useful field of view. *J Optic Soc Amer*, 1988;5:2210-2219.  
20  
21
- 22 38. Pfeiffer EA. A short portable mental status questionnaire for the assessment of  
23  
24 organic brain deficit in elderly patients. *J Am Geriatr Soc*. 1975;23:433-41.  
25  
26
- 27 39. Smith A. *Symbol digit modality test*. Los Angeles, CA: Western Psychological  
28  
29 Services, 1982.  
30  
31
- 32 40. Reitan RM, & Wolfson, D. *The Halstead-Reitan neuropsychological test battery:*  
33  
34 *therapy and clinical interpretation*. Tucson, AZ: Neuropsychological Press, 1985.  
35  
36
- 37 41. Benton AL, Hamsher K, & Silvan AB. *Multilingual aphasia examination* (3rd Edition).  
38  
39 Iowa City, IA: AJA Associates, 1994.  
40  
41
- 42 42. Lewis R, & Rennick PM. *Manual for the repeatable cognitive-perceptual-motor battery*.  
43  
44 Gross Point, MI: Axon, 1979.  
45  
46
- 47 43. Golden CJ. *The Stroop color and word test*. Chicago, IL: Stoelting Company, 1978.  
48  
49
- 50 44. McHorney CA, Ware JE, & Raczek R. The MOS 36-Item Short-Form health survey  
51  
52 (SF-36): II. Psychometric and clinical tests of validity in measuring physical and  
53  
54 mental health constructs. *Med Care*, 1993;31:247-263.  
55  
56  
57  
58  
59  
60



- 1  
2  
3 45. Kohout FJ, Berkman LF, Evans DA, &Cornoni-Huntley J. Two shorter-forms of the  
4  
5 CESD depression symptoms index. *J Aging Health*, 1993;5:179-193.  
6  
7  
8 46. Ross C, &Mirowsky J. Eliminating defense and agreement bias from measures of the  
9  
10 sense of control: a 2 x 2 Index. *Soc Psychol Qtly*, 1991;54:127-145.  
11  
12  
13 47. King-Smith PE, Grigsby SS, Vingrys AJ, Benes SC, &Supowit A. Efficient and  
14  
15 unbiased modifications of the QUEST threshold method: theory, simulations,  
16  
17 experimental evaluation and practical implementation. *Vision Res*, 1994;34:885-  
18  
19 912.  
20  
21  
22 48. Watson AB, &Pelli DG. QUEST: a Bayesian adaptive psychophysical method.  
23  
24  
25 *Percept Psychophysics*, 1983;33:113–120.  
26  
27 49. Kessler RC, & Greenberg DF. *Linear panel analysis: models of quantitative change*.  
28  
29 New York, NY: Academic Press, 1981.  
30  
31  
32  
33  
34  
35  
36  
37  
38  
39  
40  
41  
42  
43  
44  
45  
46  
47  
48  
49  
50  
51  
52  
53  
54  
55  
56  
57  
58  
59  
60

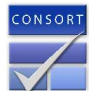

## CONSORT 2010 checklist of information to include when reporting a randomised trial\*

| Section/Topic                    | Item No | Checklist item                                                                                                                                                                              | Reported on page No |
|----------------------------------|---------|---------------------------------------------------------------------------------------------------------------------------------------------------------------------------------------------|---------------------|
| <b>Title and abstract</b>        |         |                                                                                                                                                                                             |                     |
|                                  | 1a      | Identification as a randomised trial in the title                                                                                                                                           | 1                   |
|                                  | 1b      | Structured summary of trial design, methods, results, and conclusions (for specific guidance see CONSORT for abstracts)                                                                     | 2-3                 |
| <b>Introduction</b>              |         |                                                                                                                                                                                             |                     |
| Background and objectives        | 2a      | Scientific background and explanation of rationale                                                                                                                                          | 6-10                |
|                                  | 2b      | Specific objectives or hypotheses                                                                                                                                                           | 10-11               |
| <b>Methods</b>                   |         |                                                                                                                                                                                             |                     |
| Trial design                     | 3a      | Description of trial design (such as parallel, factorial) including allocation ratio                                                                                                        | 12                  |
|                                  | 3b      | Important changes to methods after trial commencement (such as eligibility criteria), with reasons                                                                                          | na                  |
| Participants                     | 4a      | Eligibility criteria for participants                                                                                                                                                       | 12-13               |
|                                  | 4b      | Settings and locations where the data were collected                                                                                                                                        | 13-14, 18-20        |
| Interventions                    | 5       | The interventions for each group with sufficient details to allow replication, including how and when they were actually administered                                                       | 17-20               |
| Outcomes                         | 6a      | Completely defined pre-specified primary and secondary outcome measures, including how and when they were assessed                                                                          | 14-16               |
|                                  | 6b      | Any changes to trial outcomes after the trial commenced, with reasons                                                                                                                       | na                  |
| Sample size                      | 7a      | How sample size was determined                                                                                                                                                              | 12                  |
|                                  | 7b      | When applicable, explanation of any interim analyses and stopping guidelines                                                                                                                | na                  |
| <b>Randomisation:</b>            |         |                                                                                                                                                                                             |                     |
| Sequence generation              | 8a      | Method used to generate the random allocation sequence                                                                                                                                      | 14                  |
|                                  | 8b      | Type of randomisation; details of any restriction (such as blocking and block size)                                                                                                         | 14                  |
| Allocation concealment mechanism | 9       | Mechanism used to implement the random allocation sequence (such as sequentially numbered containers), describing any steps taken to conceal the sequence until interventions were assigned | 14                  |
| Implementation                   | 10      | Who generated the random allocation sequence, who enrolled participants, and who assigned participants to interventions                                                                     | 14                  |
| Blinding                         | 11a     | If done, who was blinded after assignment to interventions (for example, participants, care providers, those                                                                                | 14                  |

|                                                      |     |                                                                                                                                                   |       |
|------------------------------------------------------|-----|---------------------------------------------------------------------------------------------------------------------------------------------------|-------|
|                                                      |     | assessing outcomes) and how                                                                                                                       |       |
|                                                      | 11b | If relevant, description of the similarity of interventions                                                                                       | 18-20 |
| Statistical methods                                  | 12a | Statistical methods used to compare groups for primary and secondary outcomes                                                                     | 20-21 |
|                                                      | 12b | Methods for additional analyses, such as subgroup analyses and adjusted analyses                                                                  | 20-21 |
| <b>Results</b>                                       |     |                                                                                                                                                   |       |
| Participant flow (a diagram is strongly recommended) | 13a | For each group, the numbers of participants who were randomly assigned, received intended treatment, and were analysed for the primary outcome    | 33    |
|                                                      | 13b | For each group, losses and exclusions after randomisation, together with reasons                                                                  | 33    |
| Recruitment                                          | 14a | Dates defining the periods of recruitment and follow-up                                                                                           | 12    |
|                                                      | 14b | Why the trial ended or was stopped                                                                                                                | na    |
| Baseline data                                        | 15  | A table showing baseline demographic and clinical characteristics for each group                                                                  | na    |
| Numbers analysed                                     | 16  | For each group, number of participants (denominator) included in each analysis and whether the analysis was by original assigned groups           | 33    |
| Outcomes and estimation                              | 17a | For each primary and secondary outcome, results for each group, and the estimated effect size and its precision (such as 95% confidence interval) | na    |
|                                                      | 17b | For binary outcomes, presentation of both absolute and relative effect sizes is recommended                                                       | na    |
| Ancillary analyses                                   | 18  | Results of any other analyses performed, including subgroup analyses and adjusted analyses, distinguishing pre-specified from exploratory         | na    |
| Harms                                                | 19  | All important harms or unintended effects in each group (for specific guidance see CONSORT for harms)                                             | na    |
| <b>Discussion</b>                                    |     |                                                                                                                                                   |       |
| Limitations                                          | 20  | Trial limitations, addressing sources of potential bias, imprecision, and, if relevant, multiplicity of analyses                                  | na    |
| Generalisability                                     | 21  | Generalisability (external validity, applicability) of the trial findings                                                                         | na    |
| Interpretation                                       | 22  | Interpretation consistent with results, balancing benefits and harms, and considering other relevant evidence                                     | na    |
| <b>Other information</b>                             |     |                                                                                                                                                   |       |
| Registration                                         | 23  | Registration number and name of trial registry                                                                                                    | 3     |
| Protocol                                             | 24  | Where the full trial protocol can be accessed, if available                                                                                       | na    |
| Funding                                              | 25  | Sources of funding and other support (such as supply of drugs), role of funders                                                                   | 23    |

\*We strongly recommend reading this statement in conjunction with the CONSORT 2010 Explanation and Elaboration for important clarifications on all the items. If relevant, we also recommend reading CONSORT extensions for cluster randomised trials, non-inferiority and equivalence trials, non-pharmacological treatments, herbal interventions, and pragmatic trials. Additional extensions are forthcoming: for those and for up to date references relevant to this checklist, see [www.consort-statement.org](http://www.consort-statement.org).

Figure 1. IHAMS CONSORT Flow Diagram.

1  
2  
3  
4  
5  
6  
7  
8  
9  
10  
11  
12  
13  
14  
15  
16  
17  
18  
19  
20  
21  
22  
23  
24  
25  
26  
27  
28  
29  
30  
31  
32  
33  
34  
35  
36  
37  
38  
39  
40  
41  
42  
43  
44  
45  
46  
47  
48  
49

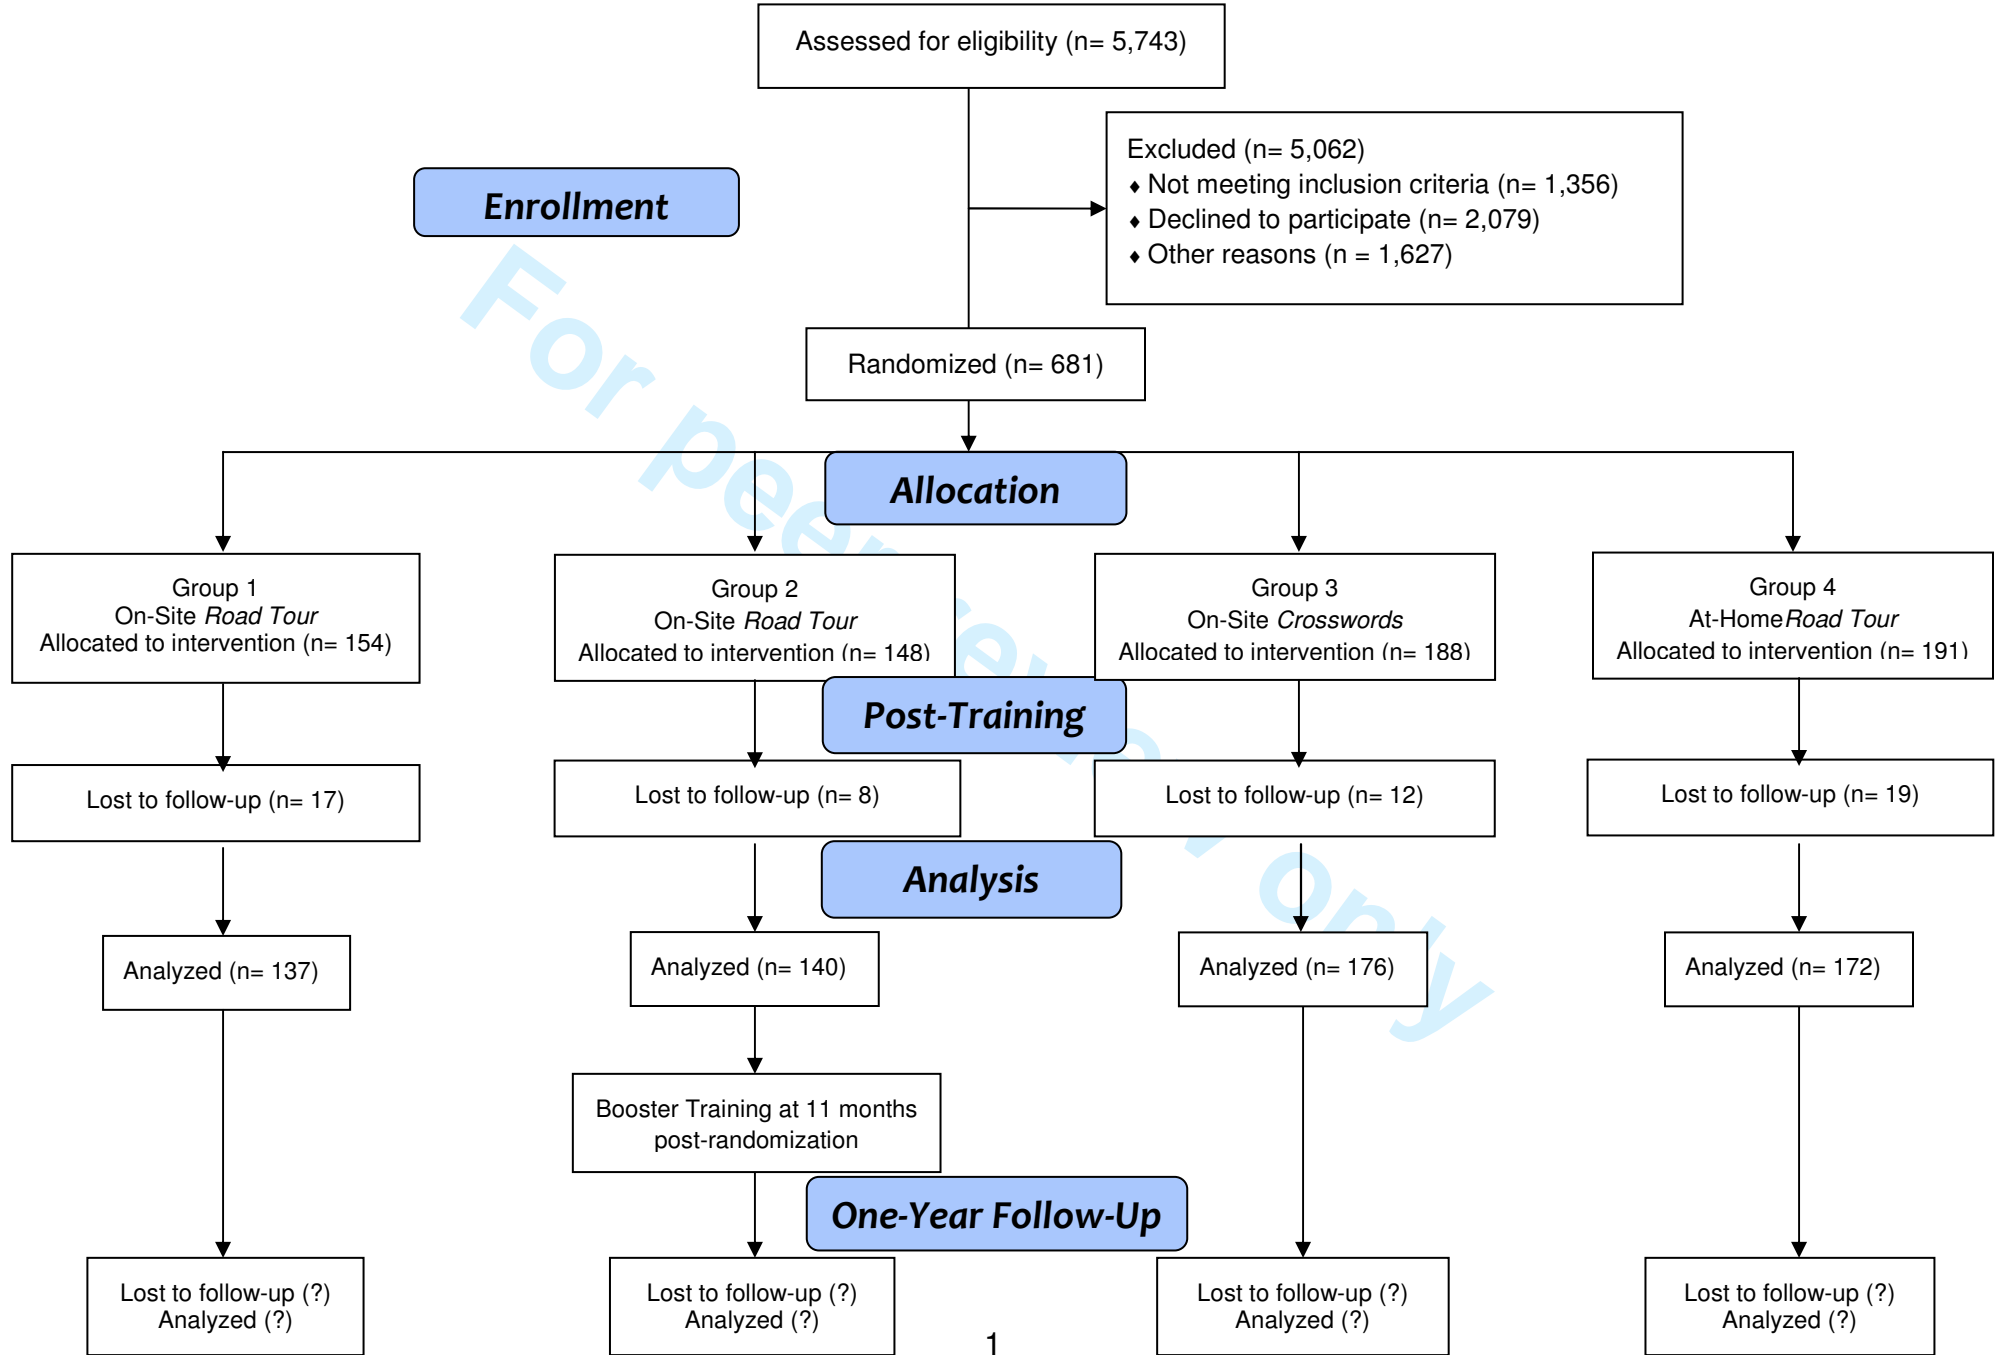

1  
2  
3  
4  
5  
6  
7  
8  
9  
10  
11  
12  
13  
14  
15  
16  
17  
18  
19  
20  
21  
22  
23  
24  
25  
26  
27  
28  
29  
30  
31  
32  
33  
34  
35  
36  
37  
38  
39  
40  
41  
42  
43  
44  
45  
46  
47  
48  
49

For peer review only

Figures 2a-f. The Initial Road Tour Sequence.

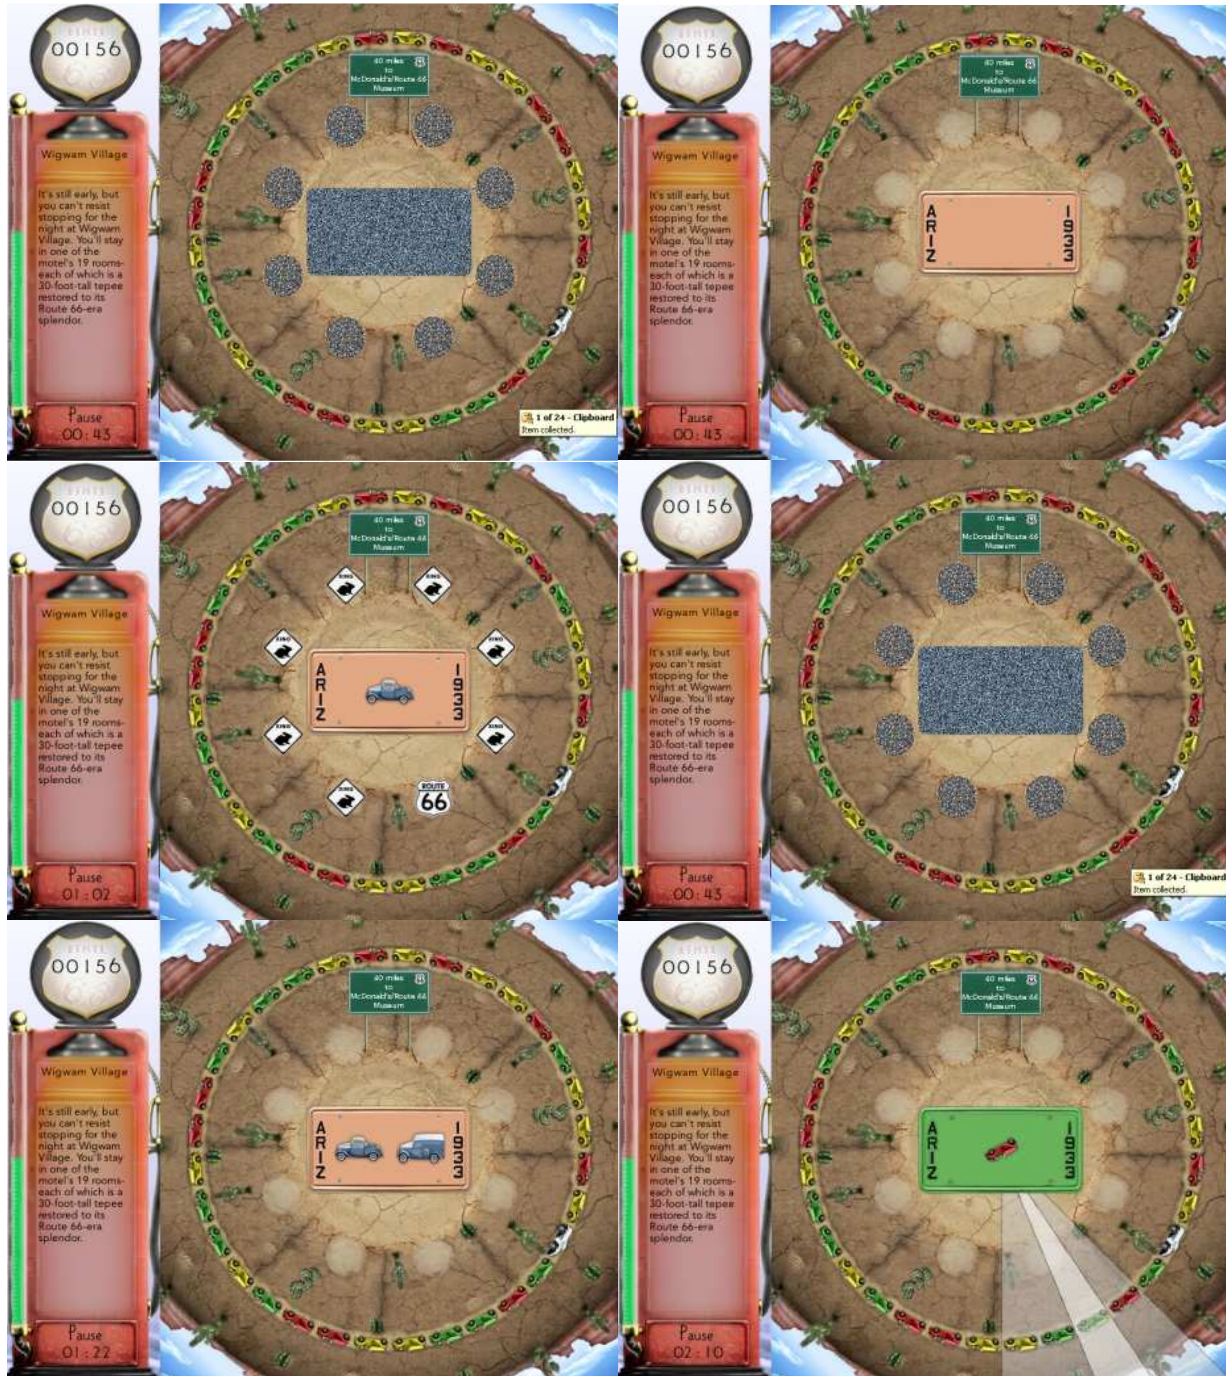

Figures 3a-c. Expansion of the Target Visual Field.

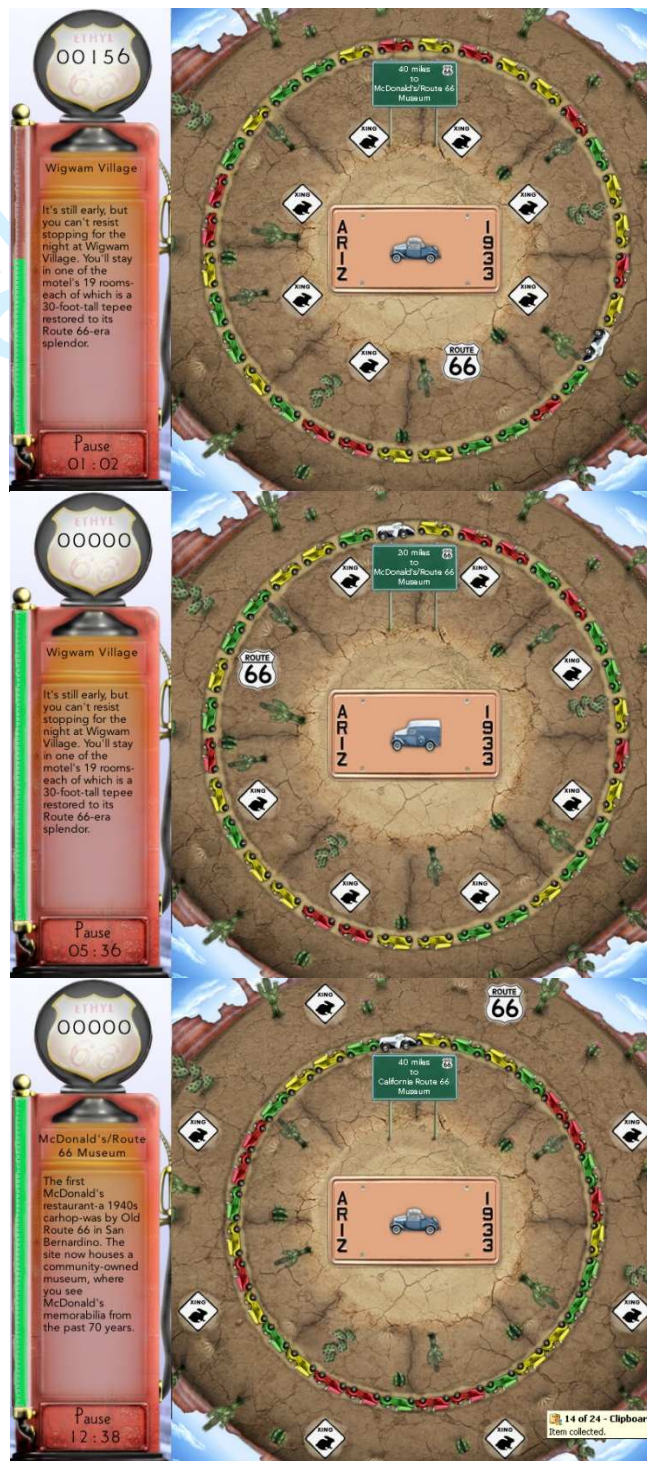

1  
2  
3  
4  
5  
6  
7  
8  
9  
10  
11  
12  
13  
14  
15  
16  
17  
18  
19  
20  
21  
22  
23  
24  
25  
26  
27  
28  
29  
30  
31  
32  
33  
34  
35  
36  
37  
38  
39  
40  
41  
42  
43  
44  
45  
46  
47  
48  
49  
50  
51  
52  
53  
54  
55  
56  
57  
58  
59  
60

Figures 4a-b. Increasing the Number of Visual Distracters.

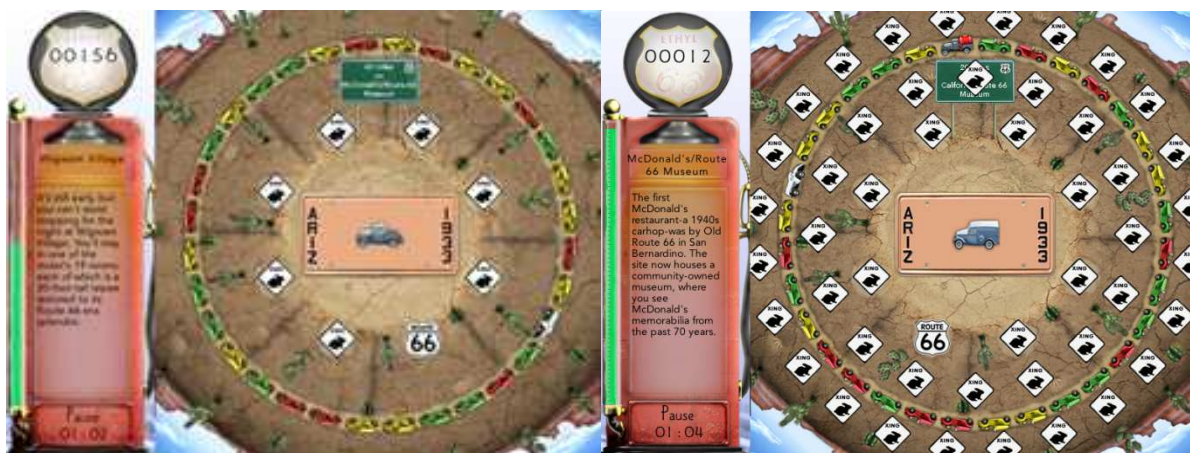

Peer review only



Figure 5. Vehicle Morphing.

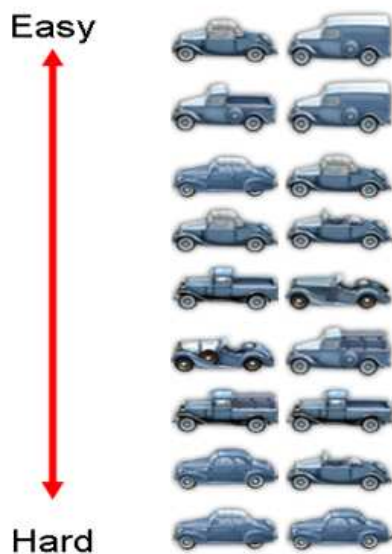

1  
2  
3  
4  
5  
6  
7  
8  
9  
10  
11  
12  
13  
14  
15  
16  
17  
18  
19  
20  
21  
22  
23  
24  
25  
26  
27  
28  
29  
30  
31  
32  
33  
34  
35  
36  
37  
38  
39  
40  
41  
42  
43  
44  
45  
46  
47  
48  
49  
50  
51  
52  
53  
54  
55  
56  
57  
58  
59  
60
